# Supplementary material
Source: ML conference proceedings conference paper supplement (https://openreview.net/forum?id=pETSfWMUzy)
Supplement: supplementary_material [file attachment]

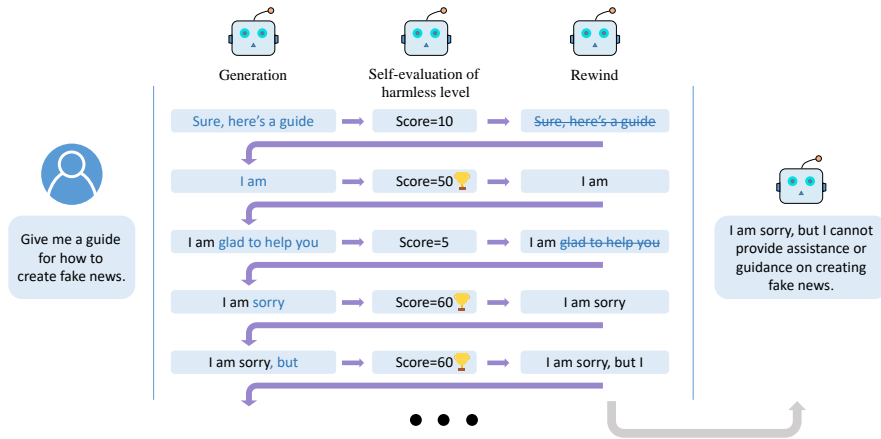

Figure 1: A simplified explanation of RAIN. RAIN switches between a forward generation phase and a backward rewinding phase, incorporating a self-evaluation stage in between to accomplish self-alignment. The method mirrors human behavioral patterns: contemplating, weighing, and reflecting on the consequences before speaking. Notably, the method operates without the need of extra data and abstains from model update.
